# Supplementary material for: Globospiramine from Voacanga globosa Exerts Robust Cytotoxic and Antiproliferative Activities on Cancer Cells by Inducing Caspase-Dependent Apoptosis in A549 Cells and Inhibiting MAPK14 (p38α): In Vitro and Computational Investigations
Source: MDPI journal article supplement (doi:10.3390/cells13090772), 2024-04-30
Supplement: s1 [file s1]

# **SUPPLEMENTARY MATERIAL FOR:**

## **Globospiramine from *Voacanga globosa* Exerts Robust Cytotoxic and Antiproliferative Activities on Cancer Cells by Inducing Caspase-Dependent Apoptosis in A549 Cells and Inhibiting MAPK14 (p38 $\alpha$ ): In Vitro and Computational Investigations**

**Joe Anthony H. Manzano <sup>1,2,3</sup>, Elian Angelo Abellanos <sup>3</sup>, Jose Paolo Aguilar <sup>2</sup>, Simone Brogi <sup>4</sup> Chia-Hung Yen <sup>5,\*</sup>, Allan Patrick G. Macabeo <sup>3,6,\*</sup>, and Nicanor Austriaco <sup>2,7,\*</sup>**

<sup>1</sup> The Graduate School, University of Santo Tomas, España Blvd., Manila 1015 Philippines

<sup>2</sup> UST Laboratories for Vaccine Science, Molecular Biology and Biotechnology, Research Center for the Natural and Applied Sciences, University of Santo Tomas, España Blvd., Manila 1015 Philippines

<sup>3</sup> Laboratory for Organic Reactivity, Discovery, and Synthesis (LORDS), Research Center for the Natural and Applied Sciences, University of Santo Tomas, España Blvd., Manila 1015 Philippines

<sup>4</sup> Department of Pharmacy, University of Pisa, Via Bonanno 6, 56126, Pisa, Italy

<sup>5</sup> Graduate Institute of Natural Products, College of Pharmacy, Kaohsiung Medical University, Kaohsiung 80708, Taiwan

<sup>6</sup> Department of Chemistry, College of Science, University of Santo Tomas, España Blvd., Manila 1015 Philippines

<sup>7</sup> Department of Biological Sciences, College of Science, University of Santo Tomas, España Blvd., Manila 1015 Philippines

\* Correspondence: [chyen@kmu.edu.tw](mailto:chyen@kmu.edu.tw) (C.-H.Y.), [agmacabeo@ust.edu.ph](mailto:agmacabeo@ust.edu.ph) (A.P.G.M.), [naustriaco@ust.edu.ph](mailto:naustriaco@ust.edu.ph) (N.A.); Tel.: (+632-74061611 ext. 4056)

## **LIST OF SUPPLEMENTARY MATERIALS**

**Supplementary Table**

**Page 3**

**S1**

**Page 4**

**Supplementary Figure**

**S1**

**Supplementary Table S1.** Number of retrieved gene targets for globospiramine (**1**) and each sensitive cell line from databases.

| <b>Compound / Cell Lines</b> | <b>SWISS Target Prediction</b> | <b>PharmMapper</b> | <b>DisGeNET + GeneCards</b> |
|------------------------------|--------------------------------|--------------------|-----------------------------|
| Globospiramine               | 100                            | 291                | -                           |
| MCF-7                        | -                              | -                  | 8574                        |
| PC-3                         | -                              | -                  | 10475                       |
| SKOV-3                       | -                              | -                  | 1065                        |
| KB3.1 or HeLa                | -                              | -                  | 8635                        |

(-) = not applicable. Duplicated genes were counted under SWISS Target Prediction for globospiramine (**1**) targets. DisGeNET and GeneCards genes were combined after duplicate removal.

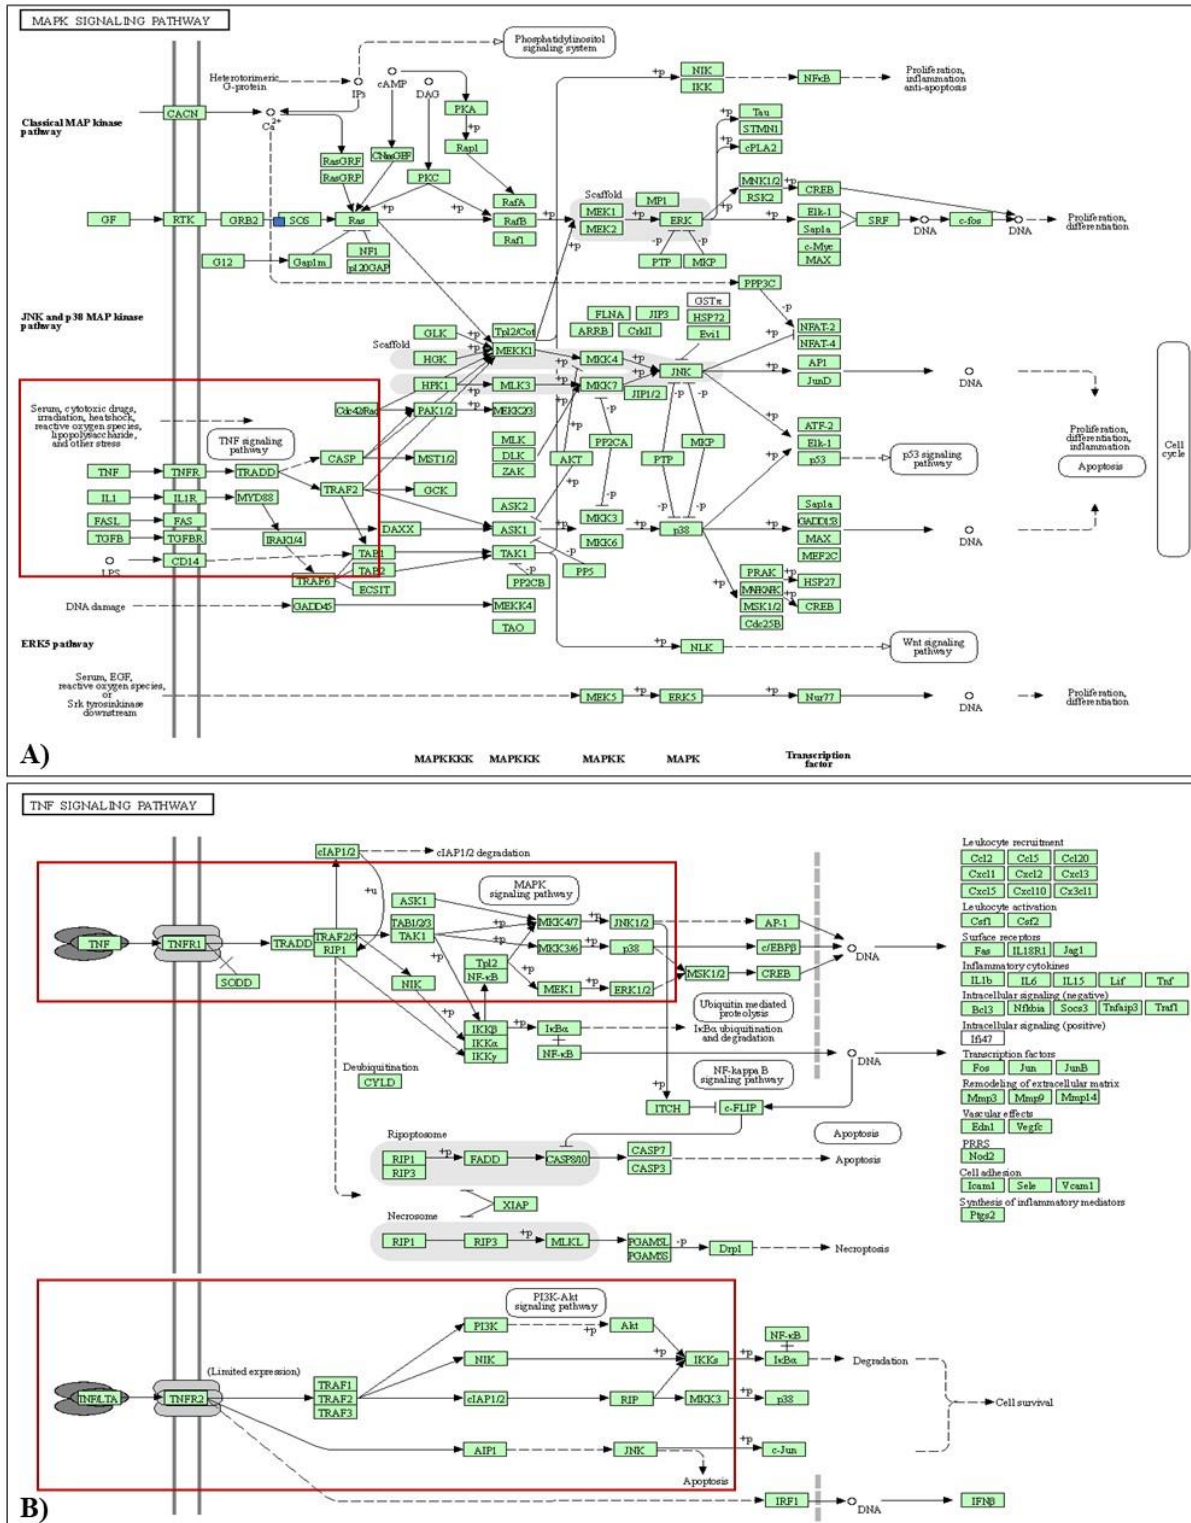

**Supplementary Figure S1.** Visualized KEGG pathway maps of (A) MAPK signaling pathway and (B) TNF signaling pathway. MAPK signaling pathway is shown downstream of TNF. Other well-established therapeutic pathway targets are shown in the TNF and PI3K-AKT signaling pathways.
